# Supplementary material for: Fluid accumulation and major adverse kidney events in sepsis: a multicenter observational study
Source: PubMed Central journal article supplement (PMC9250912; doi:10.1186/s13613-022-01040-6), 2022-07-04
Supplement: 13613_2022_1040_MOESM1_ESM.pdf [file 13613_2022_1040_MOESM1_ESM.pdf]

# **Additional Methods**

## **Content**

|                                                                     |          |
|---------------------------------------------------------------------|----------|
| <b>Detailed list of exposure variables.....</b>                     | <b>2</b> |
| <b>Filtering and processing of mean arterial pressure data.....</b> | <b>4</b> |
| <b>Description of Variable Importance analysis.....</b>             | <b>5</b> |

Exposure variables collected at baseline or during exposure period.

| Variable                                                                     | Unit      | Definition                                                                                                                                                                                                                               | Variable type                                                                                                                 |
|------------------------------------------------------------------------------|-----------|------------------------------------------------------------------------------------------------------------------------------------------------------------------------------------------------------------------------------------------|-------------------------------------------------------------------------------------------------------------------------------|
| <b>Primary exposure variable</b>                                             |           |                                                                                                                                                                                                                                          |                                                                                                                               |
| Cumulative fluid balance                                                     | ml or L   | Cumulative fluid input minus cumulative fluid output (primary exposure variable) during the first two days in ICU                                                                                                                        | Continuous                                                                                                                    |
| <b>Baseline exposure variables</b>                                           |           |                                                                                                                                                                                                                                          |                                                                                                                               |
| Age                                                                          | years     | Age on ICU admission                                                                                                                                                                                                                     | Continuous                                                                                                                    |
| Sex                                                                          |           | Patient sex                                                                                                                                                                                                                              | Dichotomous                                                                                                                   |
| Body weight                                                                  | kg        | First recorded body weight in ICU                                                                                                                                                                                                        | Continuous                                                                                                                    |
| Baseline creatinine                                                          | μmol/l    | Determined by the following hierarchical approach:<br>1. First plasma creatinine value recorded in the ICU<br>2. Most recent creatinine level obtained within one year before ICU admission<br>3. Estimated by a three-variable equation | Continuous                                                                                                                    |
| Chronic liver disease                                                        |           | ICD-10 codes: K70.X, K72.1, K73.X, K74.X, K75.4, K76.0, K76.1, K76.6                                                                                                                                                                     | Dichotomous                                                                                                                   |
| Chronic cardiac disease                                                      |           | ICD-10 codes: I25.X, I50.X                                                                                                                                                                                                               | Dichotomous                                                                                                                   |
| Chronic respiratory disease                                                  |           | ICD-10 codes: J42.X, J43.X, J44.X, J45.X, J95.X                                                                                                                                                                                          | Dichotomous                                                                                                                   |
| Immune deficiency                                                            |           | ICD-10 codes: CXX.X, D83.0, D84.8, D84.9, T45.1, V43.3, Z51.1, Z85.X                                                                                                                                                                     | Dichotomous                                                                                                                   |
| Location before ICU admission                                                |           | Location before admission to ICU at hospital A-C for sepsis                                                                                                                                                                              | Nominal:<br>1. Other ICU<br>2. Emergency Department<br>3. Recovery<br>4. Operating Room<br>5. High Dependency Unit<br>6. Ward |
| Admission hospital                                                           |           | First hospital in which the patient was admitted to ICU for sepsis                                                                                                                                                                       | Nominal:<br>1. Hospital A<br>2. Hospital B<br>3. Hospital C                                                                   |
| Admission year                                                               |           | 2005-2018                                                                                                                                                                                                                                | Continuous                                                                                                                    |
| <b>Exposure variables reflecting illness severity during exposure period</b> |           |                                                                                                                                                                                                                                          |                                                                                                                               |
| Highest noradrenaline infusion rate                                          | μg/kg/min | During the first two days in ICU                                                                                                                                                                                                         | Ordinal:<br>1. ≤0.10<br>2. 0.11-0.20<br>3. >0.20                                                                              |
| Vasopressin infusion                                                         |           |                                                                                                                                                                                                                                          | Dichotomous                                                                                                                   |
| Inotropic support                                                            |           | Continuous infusion of either adrenaline, dobutamine, levosimendan or milrinone                                                                                                                                                          | Dichotomous                                                                                                                   |

|                                                                                                                                                                                                                                                                                                                                                                                                                                                                                                                                                                                                                                                                                                                                           |                   |                                                                                                                                         |                                                     |
|-------------------------------------------------------------------------------------------------------------------------------------------------------------------------------------------------------------------------------------------------------------------------------------------------------------------------------------------------------------------------------------------------------------------------------------------------------------------------------------------------------------------------------------------------------------------------------------------------------------------------------------------------------------------------------------------------------------------------------------------|-------------------|-----------------------------------------------------------------------------------------------------------------------------------------|-----------------------------------------------------|
| Duration of MAP <65 mmHg                                                                                                                                                                                                                                                                                                                                                                                                                                                                                                                                                                                                                                                                                                                  | hours             | The cumulative duration during the exposure period was calculated after filtering and processing of high-resolution data (see Table S2) | Ordinal:<br>1. <5<br>2. 5-10<br>3. >10              |
| Invasive mechanical ventilation                                                                                                                                                                                                                                                                                                                                                                                                                                                                                                                                                                                                                                                                                                           |                   | Mechanical ventilation via endotracheal tube or tracheostomy                                                                            | Dichotomous                                         |
| Highest blood lactate level $\geq 2$ mmol/l                                                                                                                                                                                                                                                                                                                                                                                                                                                                                                                                                                                                                                                                                               | mmol/l            | Any level equal to or above 2 mmol/l. Measured on arterial blood on blood gas analyzer                                                  | Dichotomous                                         |
| Highest bilirubin level                                                                                                                                                                                                                                                                                                                                                                                                                                                                                                                                                                                                                                                                                                                   | $\mu\text{mol/l}$ | Measured at hospital laboratory                                                                                                         | Ordinal:<br>1. <20<br>2. 20-32<br>3. >32            |
| Lowest platelet count                                                                                                                                                                                                                                                                                                                                                                                                                                                                                                                                                                                                                                                                                                                     | $\times 10^9$     | Measured at hospital laboratory                                                                                                         | Ordinal:<br>1. $\geq 150$<br>2. 100-149<br>3. <100  |
| <b>Exposure to potentially nephrotoxic drugs during exposure period</b>                                                                                                                                                                                                                                                                                                                                                                                                                                                                                                                                                                                                                                                                   |                   |                                                                                                                                         |                                                     |
| Vancomycin                                                                                                                                                                                                                                                                                                                                                                                                                                                                                                                                                                                                                                                                                                                                |                   | Any dose administered by intravenous injection or continuous infusion                                                                   | Dichotomous                                         |
| Aminoglycoside                                                                                                                                                                                                                                                                                                                                                                                                                                                                                                                                                                                                                                                                                                                            |                   | Any intravenous dose of gentamicin, tobramycin, amikacin, or netilmicin                                                                 | Dichotomous                                         |
| Hydroxyethyl starch                                                                                                                                                                                                                                                                                                                                                                                                                                                                                                                                                                                                                                                                                                                       |                   | Any volume of Hydroxyethyl Starch 130/0.4                                                                                               | Dichotomous                                         |
| <b>Level of systemic inflammation during exposure period</b>                                                                                                                                                                                                                                                                                                                                                                                                                                                                                                                                                                                                                                                                              |                   |                                                                                                                                         |                                                     |
| Highest C-reactive protein level                                                                                                                                                                                                                                                                                                                                                                                                                                                                                                                                                                                                                                                                                                          | mg/l              | Measured at hospital laboratory                                                                                                         | Continuous                                          |
| <b>Other exposure variables potentially associated with both the primary exposure and outcome</b>                                                                                                                                                                                                                                                                                                                                                                                                                                                                                                                                                                                                                                         |                   |                                                                                                                                         |                                                     |
| Cumulative chloride dose                                                                                                                                                                                                                                                                                                                                                                                                                                                                                                                                                                                                                                                                                                                  | mmol              | Calculated from all intravenous fluids                                                                                                  | Ordinal:<br>1. <500<br>2. 500-999<br>3. $\geq 1000$ |
| Furosemide                                                                                                                                                                                                                                                                                                                                                                                                                                                                                                                                                                                                                                                                                                                                |                   | Any dose administered by intravenous injection or continuous infusion                                                                   | Dichotomous                                         |
| Red blood cell transfusion                                                                                                                                                                                                                                                                                                                                                                                                                                                                                                                                                                                                                                                                                                                |                   | Administration of at least one unit                                                                                                     | Dichotomous                                         |
| Highest blood chloride level                                                                                                                                                                                                                                                                                                                                                                                                                                                                                                                                                                                                                                                                                                              | mmol/l            | Measured on arterial blood on blood gas analyzer and categorized based on data from previous publications <sup>1-3</sup>                | Ordinal:<br>1. <108<br>2. 108-111<br>3. >111        |
| Abbreviations: ICD-10, International Classification of Diseases, 10th revision<br>References:<br>1. Zhang Z, Xu X, Fan H, Li D, Deng H (2013) Higher serum chloride concentrations are associated with acute kidney injury in unselected critically ill patients. BMC Nephrol 28;14:235<br>2. Neyra JA, Canepa-Escaro F, Li X, Manllo J, Adams-Huet B, Yee J, Yessayan L (2015) Association of Hyperchloremia With Hospital Mortality in Critically Ill Septic Patients. Crit Care Med 43(9):1938-44<br>3. Suetrong B, Pisitsak C, Boyd JH, Russell JA, Walley KR (2016) Hyperchloremia and moderate increase in serum chloride are associated with acute kidney injury in severe sepsis and septic shock patients. Crit Care 6;20(1):315 |                   |                                                                                                                                         |                                                     |

## Filtering and processing of mean arterial pressure data

| Data Collection                                                                                                                                                                                                                                                                                                                                                                                                                                                                                                                                                                                                                                                                                                                                                                                                                                                                                                |
|----------------------------------------------------------------------------------------------------------------------------------------------------------------------------------------------------------------------------------------------------------------------------------------------------------------------------------------------------------------------------------------------------------------------------------------------------------------------------------------------------------------------------------------------------------------------------------------------------------------------------------------------------------------------------------------------------------------------------------------------------------------------------------------------------------------------------------------------------------------------------------------------------------------|
| The mean arterial pressure (MAP) was measured via an indwelling arterial line. MAP measurements were automatically transferred to the Centricity Critical Care electronic patient data management system in intervals of 2 minutes on average.                                                                                                                                                                                                                                                                                                                                                                                                                                                                                                                                                                                                                                                                 |
| Pre-filtering                                                                                                                                                                                                                                                                                                                                                                                                                                                                                                                                                                                                                                                                                                                                                                                                                                                                                                  |
| <ol style="list-style-type: none"><li>1. Data points with MAP below 20 mmHg or above 250 mmHg were considered outliers due to artifacts and removed.</li><li>2. Patients with less than 50 recordings (between 20 and 250 mmHg) were not considered.</li><li>3. The time stamp of the first recording of each patient was set to be time 0 (zero) min.</li></ol>                                                                                                                                                                                                                                                                                                                                                                                                                                                                                                                                               |
| Filtering                                                                                                                                                                                                                                                                                                                                                                                                                                                                                                                                                                                                                                                                                                                                                                                                                                                                                                      |
| For each recording $r$ of each patient: <ol style="list-style-type: none"><li>1. A window <math>w</math> of 20 minutes around the recording (10 minutes before and 10 minutes after) was considered. If there were less than 10 minutes before or after the recording, the maximum amount of available minutes were considered.</li><li>2. The median MAP <math>m</math> of the recordings in the window <math>w</math> was calculated.</li><li>3. The median absolute deviation (MAD) of the recordings in the window <math>w</math> was calculated. The MAD is the median absolute distance between the recordings in the window <math>w</math> and the median MAP <math>m</math>.</li><li>4. If the absolute distance between the recording <math>r</math> and the median MAP <math>m</math> was 4 times bigger than the MAD, the recording <math>r</math> was considered an outlier and removed.</li></ol> |
| Processing                                                                                                                                                                                                                                                                                                                                                                                                                                                                                                                                                                                                                                                                                                                                                                                                                                                                                                     |
| After filtering, the cumulative time that a patient's MAP was below 65 mmHg was calculated. <ul style="list-style-type: none"><li>• If there were no recordings between two recordings with less than 65 mmHg, it was assumed the patient remained with a MAP below 65 mmHg for the time missing.</li><li>• The MAP between recordings below and above 65 mmHg was linearly interpolated to smooth the cumulative time.</li></ul>                                                                                                                                                                                                                                                                                                                                                                                                                                                                              |

## Description of Variable Importance analysis

In a classification analysis such using the recursive partitioning function implemented in the 'rpart' R package (Therneau et al. 2017), the algorithm tries to find a rule  $c(x)$  consisting of binary splits that sorts the input population into different groups/classes.

In order to find the best splits, a loss function is minimized. The loss function measures how many observations have been classified correctly. Note that a variable  $x_i$ ,  $i=1, \dots, n$  can be split several times. An overall measure of variable importance is the sum of the goodness of split measures (obtained with the loss function) for each split for which it was the primary variable, plus goodness \* (adjusted agreement) for all splits in which it was a surrogate (=help to account for missing values). In order to calculate the relative importance, the importance of each variable was divided by the total importance obtained by summing over all variables considered.

The loss function is also called 0-1 loss function in this context since it is based on a sum of zeros and ones: 1 if the observation was correctly classified and 0 if not. If the sum is divided by the number of observation it is also referred to as error rate.

Reference:

Therneau, T, Atkinson B, Ripley B (2017) rpart: Recursive Partitioning and Regression Trees., <https://CRAN.R-project.org/package=rpart>, r package version 4.1-11.
